# Supplementary material for: A multivariate time-frequency method to characterize the influence of respiration over heart period and arterial pressure
Source: Springer Nature journal article supplement (doi:10.1186/1687-6180-2012-214), 2012-10-04

(a) Example of  $x_R(t)$  from TTCR

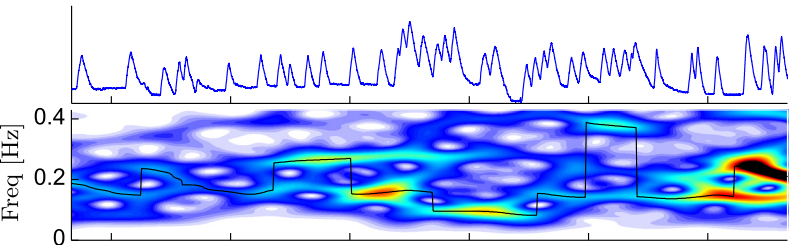

(b) Example of  $x_R(t)$  from TTSR

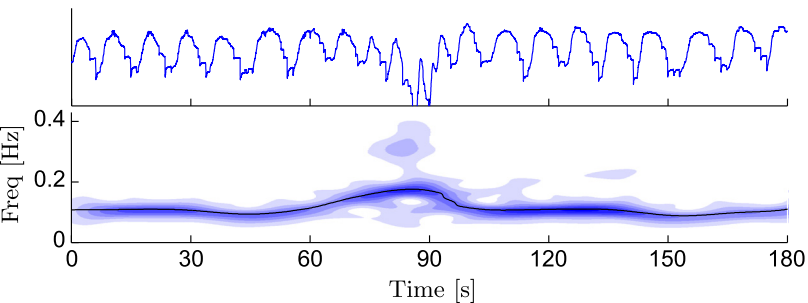

(c) Distribution from TTCR

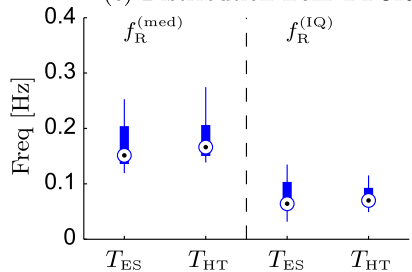

(d) Distribution from TTSR

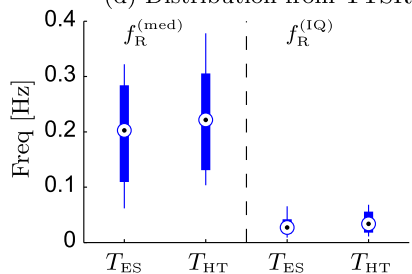

Supplement: 13634_2011_336_MOESM6_ESM.pdf [file 13634_2011_336_MOESM6_ESM.pdf]
