# Supplementary material for: A multivariate time-frequency method to characterize the influence of respiration over heart period and arterial pressure
Source: Springer Nature journal article supplement (doi:10.1186/1687-6180-2012-214), 2012-10-04
Supplement: 13634_2011_336_MOESM7_ESM.pdf [file 13634_2011_336_MOESM7_ESM.pdf]

(a) Coherence [Atropine]

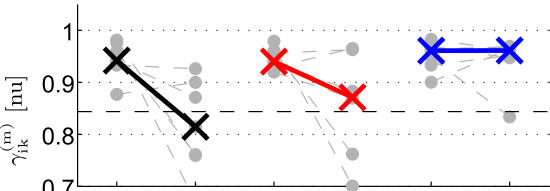

(c) Partial Coherence [Atropine]

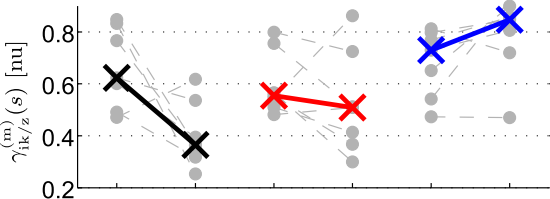

(e) Phase difference [Atropine]

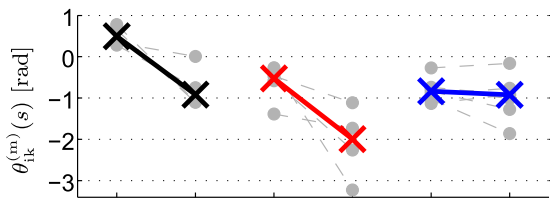

(g) Time delay [Atropine]

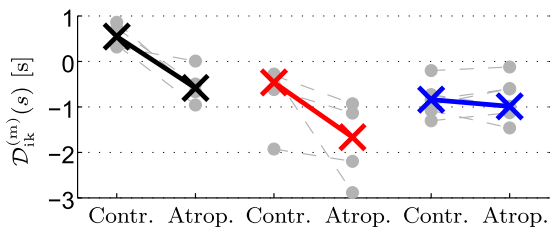

(b) Coherence [Propranolol]

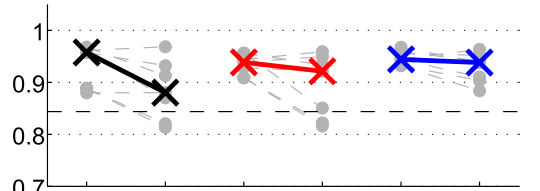

(d) Partial Coherence [Propranolol]

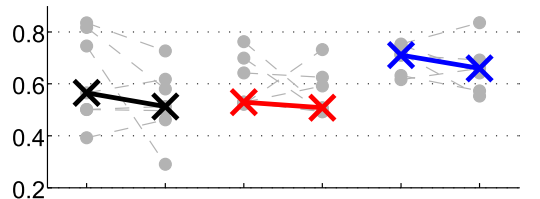

(f) Phase difference [Propranolol]

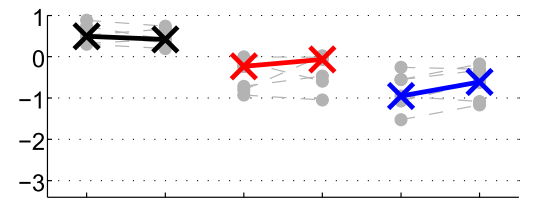

(h) Time delay [Propranolol]

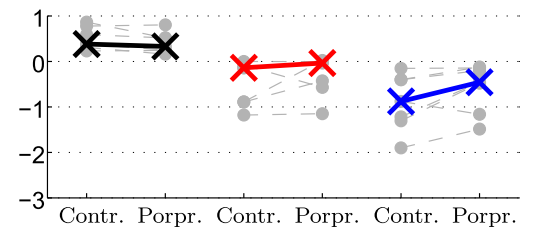

$\blackstar \gamma_{SH}^{(m)}$   
 $\color{red}\star \gamma_{RH}^{(m)}$   
 $\color{blue}\star \gamma_{RS}^{(m)}$

$\blackstar \gamma_{SH/R}^{(m)}$   
 $\color{red}\star \gamma_{RH/S}^{(m)}$   
 $\color{blue}\star \gamma_{RS/H}^{(m)}$

$\blackstar \theta_{SH}^{(m)}$   
 $\color{red}\star \theta_{RH}^{(m)}$   
 $\color{blue}\star \theta_{RS}^{(m)}$

$\blackstar \mathcal{D}_{SH}^{(m)}$   
 $\color{red}\star \mathcal{D}_{RH}^{(m)}$   
 $\color{blue}\star \mathcal{D}_{RS}^{(m)}$
