# Supplementary material for: A multivariate time-frequency method to characterize the influence of respiration over heart period and arterial pressure
Source: Springer Nature journal article supplement (doi:10.1186/1687-6180-2012-214), 2012-10-04

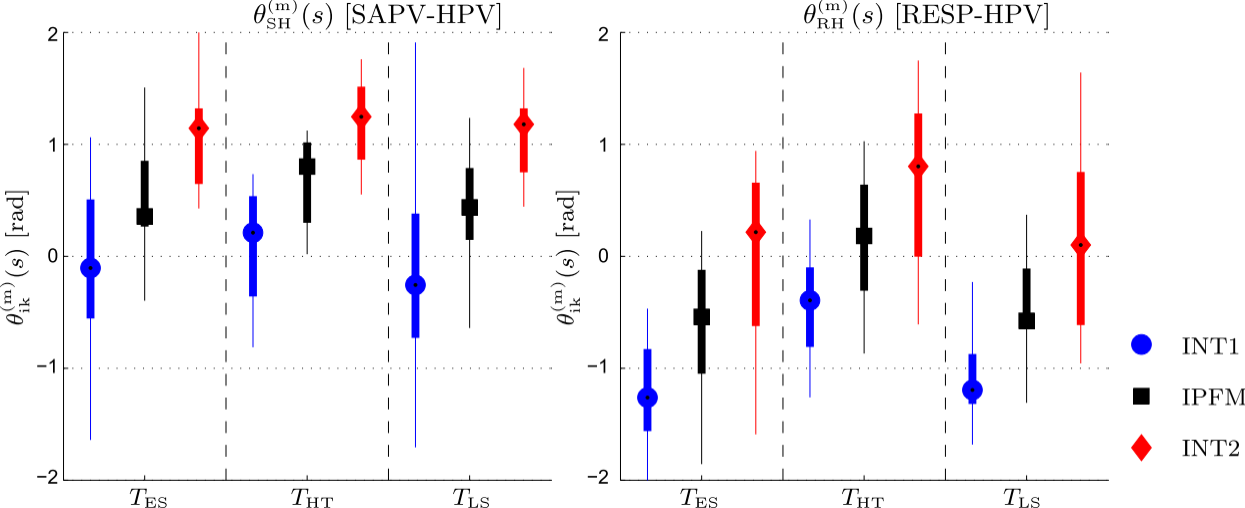

Supplement: 13634_2011_336_MOESM8_ESM.pdf [file 13634_2011_336_MOESM8_ESM.pdf]
